# Supplementary material
Source: PubMed Central journal article supplement (PMC9647025)
Supplement: mmc1.pdf [file mmc1.pdf]

**Supplemental information**

**Anatomical barriers against SARS-CoV-2  
neuroinvasion at vulnerable interfaces  
visualized in deceased COVID-19 patients**

**Mona Khan, Marnick Clijsters, Sumin Choi, Wout Backaert, Michiel Claerhout, Floor Couvreur, Laure Van Breda, Florence Bourgeois, Kato Speleman, Sam Klein, Johan Van Laethem, Gill Verstappen, Ayse Sumeyra Dereli, Seung-Jun Yoo, Hai Zhou, Thuc Nguyen Dan Do, Dirk Jochmans, Lies Laenen, Yves Debaveye, Paul De Munter, Jan Gunst, Mark Jorissen, Katrien Lagrou, Philippe Meersseman, Johan Neyts, Dietmar Rudolf Thal, Vedat Topsakal, Christophe Vandenbriele, Joost Wauters, Peter Mombaerts, and Laura Van Gerven**

### Patient characteristics

|                              | COVID-19<br>(n=45) | Control<br>(n=8) |
|------------------------------|--------------------|------------------|
| Age                          | 79 (75–91)         | 77 (69–85)       |
| Men                          | 31 (69%)           | 3 (38%)          |
| Medical history              |                    |                  |
| Body mass index              |                    |                  |
| BMI < 18.5                   | 3 (7%)             | 0 (0%)           |
| BMI 18.5 – 25                | 18 (40%)           | 4 (50%)          |
| BMI 25 – 30                  | 14 (31%)           | 2 (25%)          |
| BMI 30 – 40                  | 9 (20%)            | 1 (13%)          |
| BMI > 40                     | 1 (2%)             | 1 (13%)          |
| Diabetes mellitus type 2     | 23 (51%)           | 1 (13%)          |
| Hypertension                 | 36 (80%)           | 6 (75%)          |
| Chronic kidney disease       | 23 (51%)           | 1 (13%)          |
| Cardiovascular disease       | 25 (56%)           | 6 (75%)          |
| Chronic lung disease         | 19 (42%)           | 5 (63%)          |
| Neurodegenerative disease    | 8 (18%)            | 0 (0%)           |
| Smoking                      | 31 (69%)           | 5 (63%)          |
| Current                      | 5 (11%)            | 2 (25%)          |
| Former                       | 26 (58%)           | 3 (38%)          |
| Active oncological condition | 12 (27%)           | 1 (13%)          |
| Organ transplant             | 1 (2%)             | 0 (0%)           |
| Immunosuppressive medication | 16 (36%)           | 0 (0%)           |
| Vaccination status           |                    |                  |
| Vaccinated                   | 37 (82%)           | 8 (100%)         |
| Unvaccinated                 | 4 (9%)             | 0 (0%)           |
| Unknown                      | 4 (12%)            | 0 (0%)           |

### Disease characteristics

|                                     | COVID-19<br>(n=45) | Control<br>(n=8) |
|-------------------------------------|--------------------|------------------|
| COVID-19 diagnosis by PCR           |                    |                  |
| ≤ 7 days prior to death             | 21 (47%)           |                  |
| > 7 and ≤ 14 days                   | 18 (40%)           |                  |
| > 14 and ≤ 21 days                  | 4 (9%)             |                  |
| > 21 and ≤ 28 days                  | 0 (0%)             |                  |
| > 28 days                           | 2 (4%)             |                  |
| Cause of death                      |                    |                  |
| from COVID-19                       | 30 (67%)           |                  |
| with COVID-19                       | 15 (33%)           |                  |
| Fatal breakthrough infection        | 25 (56%)           |                  |
| Days hospitalized                   | 6 (4–10)           | 15 (5–21)        |
| Intensive care                      | 4 (9%)             | 8 (100%)         |
| Respiratory support                 |                    |                  |
| Non-invasive modalities             | 43 (96%)           | 0 (0%)           |
| Conventional oxygen therapy         | 21 (47%)           | 0 (0%)           |
| High-flow nasal cannula             | 22 (49%)           | 0 (0%)           |
| Invasive mechanical ventilation     | 2 (4%)             | 8 (100%)         |
| Prone                               | 2 (4%)             | 0 (0%)           |
| Extracorporeal membrane oxygenation | 0 (0%)             | 1 (13%)          |
| Pharmacological therapy             |                    |                  |
| Anticoagulation                     | 37 (82%)           | 8 (100%)         |
| Steroids                            | 33 (73%)           | 4 (50%)          |
| Antivirals                          | 2 (4%)             | 0 (0%)           |
| Antibiotics                         | 32 (71%)           | 8 (100%)         |
| Interleukin receptor modulators     | 1 (2%)             | 0 (0%)           |
| Convalescent plasma                 | 0 (0%)             | 0 (0%)           |

### Procedure characteristics

|                                           | COVID-19<br>(n=45) | Control<br>(n=8) |
|-------------------------------------------|--------------------|------------------|
| Postmortem interval in minutes            | 109 (92–153)       | 63 (54–74)       |
| < 50 min                                  | 1 (2%)             | 2 (25%)          |
| 50 – 100 min                              | 16 (36%)           | 6 (75%)          |
| 100 – 200 min                             | 23 (51%)           | 0 (0%)           |
| > 200 min                                 | 5 (11%)            | 0 (0%)           |
| Duration of procedure in minutes          | 100 (74–124)       | 86 (73–96)       |
| Rapid antigen test on nasopharyngeal swab |                    |                  |
| Positive                                  | 41 (91%)           | 0 (0%)           |
| Negative                                  | 4 (9%)             | 8 (100%)         |

**Figure S1. Patient, disease, and procedure characteristics of cohort II of 45 COVID-19 cases and 8 control cases, related to Figure 1**

Time variables and body mass index are expressed as median (interquartile range: Q1–Q3). Count variables are expressed as percentages.

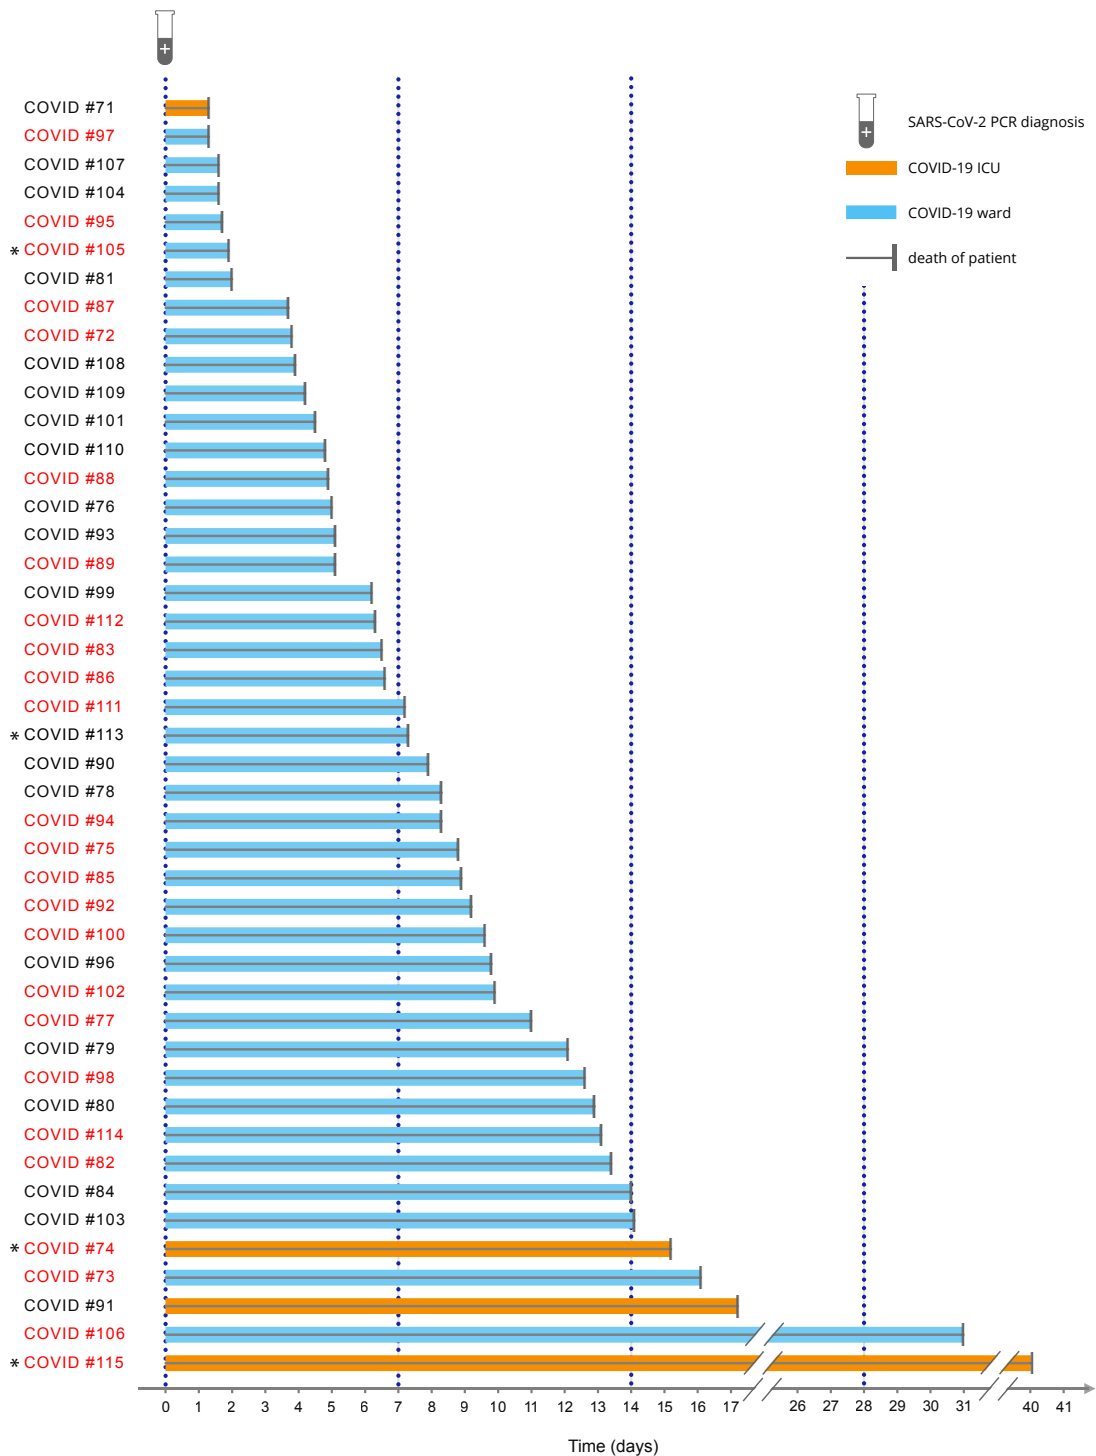

**Figure S2. Swimmer plot of cohort-II of 45 COVID-19 cases, related to Figure 1**

The vertical axis shows the pseudonyms of the cases. Red labels indicate the 25 cases of fatal breakthrough infection. Asterisks indicate the 4 non-informative cases (cases without viral RNA puncta and nucleocapsid-immunoreactive signal in the tissue samples). The horizontal axis shows the period in days starting from the time the nasopharyngeal swab was taken that led to the diagnosis of COVID-19 by PCR (indicated by a test tube at day 0) until the time of death (indicated by a vertical stop line at the end of a bar). Hospitalization in a COVID-19 unit is indicated by the start of the orange bar (ICU, intensive care unit) or the blue bar (ward).

| COVID case # | survival (days) | rapid antigen test | Ct NP swab    | Ct serum      | Ct CSF        | Anti-S IgG (AU/mL) | Anti-N IgG    | vaccination status | cause of death | type of infection | non-informative | perineurial | lepto-meningeal | frontal lobe |
|--------------|-----------------|--------------------|---------------|---------------|---------------|--------------------|---------------|--------------------|----------------|-------------------|-----------------|-------------|-----------------|--------------|
| 71           | 1.3             | positive           | 12.6          | not available | not available | not available      | not available | unvaccinated       | from           | unvaccinated      |                 |             |                 |              |
| 72           | 3.8             | positive           | 17.0          | not available | negative      | not available      | not available | vaccinated         | from           | FBI               |                 |             |                 |              |
| 73           | 16.1            | positive           | 10.2          | 26.6          | negative      | 73.6               | negative      | vaccinated         | from           | FBI               |                 |             | ✓               |              |
| 74           | 15.2            | positive           | 21.6          | negative      | not available | 32298.8            | negative      | vaccinated         | from           | FBI               | ✓               |             |                 |              |
| 75           | 8.8             | positive           | 17.2          | negative      | negative      | 78693.4            | positive      | vaccinated         | from           | FBI               |                 |             |                 |              |
| 76           | 5               | positive           | 7.9           | 30.3          | negative      | 144.8              | negative      | vaccinated         | with           | breakthrough      |                 |             | ✓               |              |
| 77           | 11              | positive           | 17.1          | 32.0          | negative      | 43465              | negative      | vaccinated         | from           | FBI               |                 |             |                 |              |
| 78           | 8.3             | positive           | 19.2          | negative      | negative      | 96                 | negative      | vaccinated         | with           | breakthrough      |                 |             | ✓               |              |
| 79           | 12.1            | positive           | 11.9          | 30.7          | negative      | 97100.8            | negative      | vaccinated         | with           | breakthrough      |                 |             | ✓               |              |
| 80           | 12.9            | positive           | 17.8          | negative      | negative      | 9277               | positive      | unvaccinated       | from           | unvaccinated      |                 |             |                 |              |
| 81           | 2               | positive           | 8.7           | 29.7          | negative      | 72.9               | negative      | vaccinated         | with           | breakthrough      |                 |             |                 |              |
| 82           | 13.4            | positive           | 12.3          | 29.7          | negative      | 248.1              | negative      | vaccinated         | from           | FBI               |                 |             |                 |              |
| 83           | 6.5             | positive           | 9.2           | 31.7          | 31.1          | 4092.1             | negative      | vaccinated         | from           | FBI               |                 |             | ✓               |              |
| 84           | 14              | positive           | 15.2          | negative      | negative      | 37889              | negative      | vaccinated         | with           | breakthrough      |                 |             |                 |              |
| 85           | 8.9             | positive           | 18.0          | 30.3          | negative      | 515.2              | negative      | vaccinated         | from           | FBI               |                 |             |                 |              |
| 86           | 6.6             | positive           | 11.9          | negative      | negative      | 84.3               | negative      | vaccinated         | from           | FBI               |                 |             |                 |              |
| 87           | 3.7             | positive           | 12.1          | 31.0          | negative      | 80.2               | negative      | vaccinated         | from           | FBI               |                 | ✓           | ✓               | ✓            |
| 88           | 4.9             | positive           | 18.4          | 33.3          | negative      | >80000             | negative      | vaccinated         | from           | FBI               |                 | ✓           | ✓               | ✓            |
| 89           | 5.1             | positive           | 11.0          | 22.3          | negative      | <21                | negative      | vaccinated         | from           | FBI               |                 | ✓           | ✓               | ✓            |
| 90           | 7.9             | positive           | not available | not available | not available | not available      | not available | unknown            | with           | not applicable    |                 | ✓           |                 |              |
| 91           | 17.2            | positive           | not available | not available | not available | not available      | not available | unknown            | from           | not applicable    |                 |             |                 |              |
| 92           | 9.2             | positive           | 15.1          | 30.2          | negative      | >80000             | negative      | vaccinated         | from           | FBI               |                 |             |                 |              |
| 93           | 5.1             | positive           | not available | not available | not available | not available      | not available | unvaccinated       | from           | unvaccinated      |                 |             |                 |              |
| 94           | 8.3             | positive           | 12.8          | 29.0          | 34.6          | 7182.5             | negative      | vaccinated         | from           | FBI               |                 | ✓           | ✓               |              |
| 95           | 1.7             | positive           | 10.3          | 35.2          | negative      | 812.9              | negative      | vaccinated         | from           | FBI               |                 |             |                 |              |
| 96           | 9.8             | positive           | 9.8           | negative      | negative      | 38075.6            | negative      | vaccinated         | with           | breakthrough      |                 |             |                 |              |
| 97           | 1.3             | positive           | not available | not available | not available | not available      | not available | vaccinated         | from           | FBI               |                 |             |                 |              |
| 98           | 12.6            | positive           | 13.6          | negative      | negative      | 1139.8             | negative      | vaccinated         | from           | FBI               |                 |             |                 |              |
| 99           | 6.2             | positive           | 10.7          | negative      | negative      | 18246              | negative      | vaccinated         | with           | breakthrough      |                 |             | ✓               |              |
| 100          | 9.6             | positive           | 11.5          | negative      | negative      | >80000             | negative      | vaccinated         | from           | FBI               |                 |             | ✓               |              |
| 101          | 4.5             | positive           | not available | not available | not available | not available      | not available | vaccinated         | with           | breakthrough      |                 |             | ✓               |              |
| 102          | 9.9             | positive           | 16.2          | 35.4          | negative      | 48.7               | negative      | vaccinated         | from           | FBI               |                 |             |                 |              |
| 103          | 14.1            | positive           | 18.3          | negative      | negative      | >80000             | positive      | vaccinated         | with           | breakthrough      |                 |             |                 |              |
| 104          | 1.6             | positive           | 12.7          | negative      | negative      | 784.7              | negative      | vaccinated         | with           | breakthrough      |                 |             |                 |              |
| 105          | 1.9             | positive           | 20.0          | negative      | negative      | 12983.4            | negative      | vaccinated         | from           | FBI               | ✓               |             |                 |              |
| 106          | 31              | negative           | not available | not available | not available | not available      | not available | vaccinated         | from           | FBI               |                 |             |                 |              |
| 107          | 1.6             | positive           | 10.1          | negative      | negative      | 6155.4             | negative      | vaccinated         | with           | breakthrough      |                 |             |                 |              |
| 108          | 3.9             | positive           | 13.4          | 34.3          | negative      | <21                | negative      | unvaccinated       | with           | unvaccinated      |                 | ✓           | ✓               | ✓            |
| 109          | 4.2             | positive           | 12.6          | negative      | negative      | 2338.3             | negative      | vaccinated         | with           | breakthrough      |                 |             |                 |              |
| 110          | 4.8             | positive           | 12.6          | 32.3          | negative      | <21                | negative      | unknown            | with           | not applicable    |                 | ✓           | ✓               | ✓            |
| 111          | 7.2             | positive           | not available | not available | not available | not available      | not available | vaccinated         | from           | FBI               |                 |             |                 |              |
| 112          | 6.3             | positive           | 13.9          | 32.2          | not available | 459.9              | negative      | vaccinated         | from           | FBI               |                 |             |                 |              |
| 113          | 7.3             | negative           | 23.8          | negative      | negative      | 11239.6            | positive      | unknown            | from           | not applicable    | ✓               |             |                 |              |
| 114          | 13.1            | negative           | 19.0          | negative      | negative      | 15110.9            | positive      | vaccinated         | from           | FBI               |                 |             |                 |              |
| 115          | 40              | negative           | 31.0          | negative      | negative      | 50.5               | positive      | vaccinated         | from           | FBI               | ✓               |             |                 |              |

**Figure S3. Summary of the findings of cohort II of 45 COVID-19 cases, related to Figure 2**

Rapid antigen tests carried out on postmortem nasopharyngeal (NP) swabs were scored visually as positive or negative. Ct values are from PCR assays done on a postmortem nasopharyngeal swab, serum sample, and cerebrospinal fluid (CSF) sample. The values of the anti-S IgG titers in AU (Arbitrary Units)/ml are shown graphically in Figure 2D. The type of infection in a vaccinated patient who died *from* COVID-19 is referred to as "FBI", for fatal breakthrough infection. The type of infection in a vaccinated patient who died *with* COVID-19 is referred to as "breakthrough".

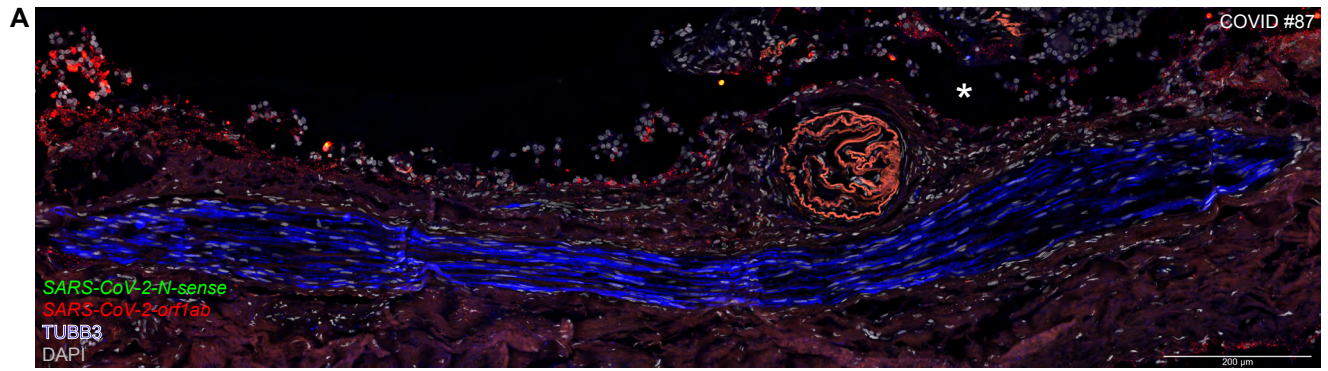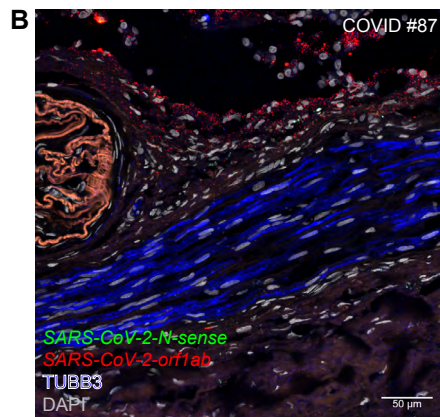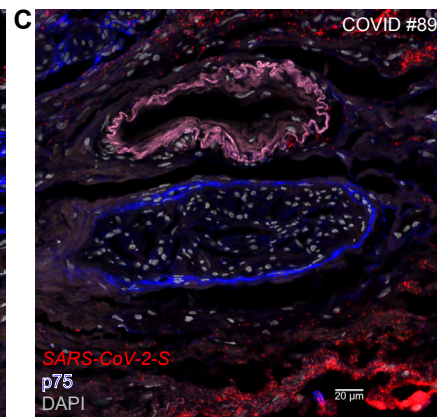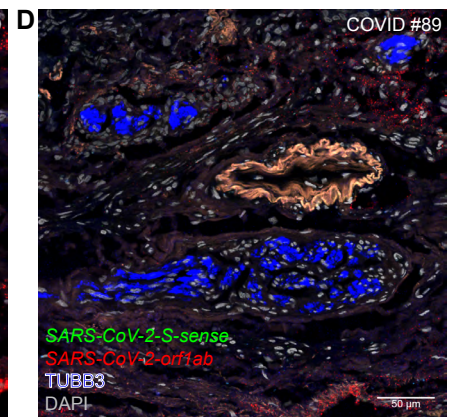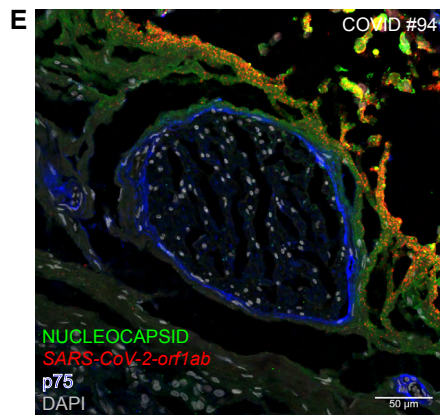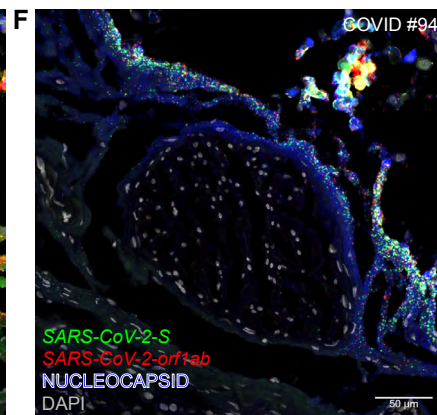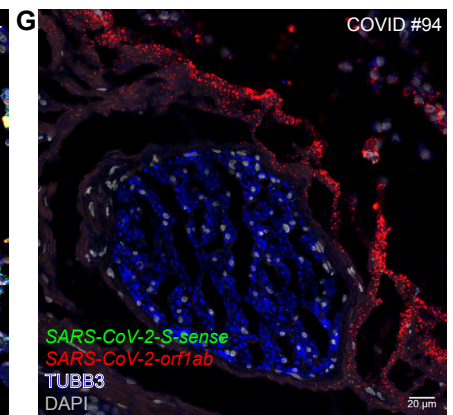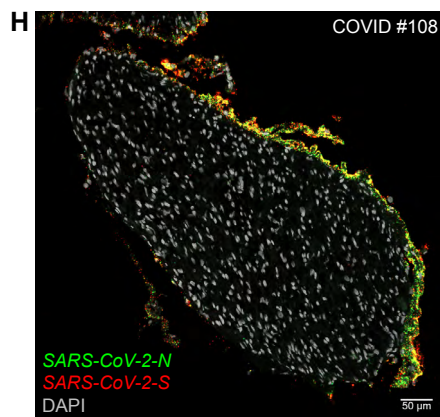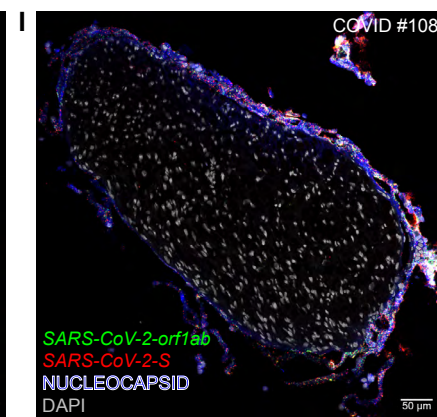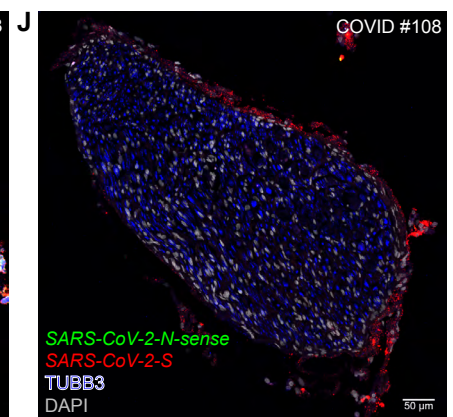

**Figure S4. RNAscope with *N*, *S*, *orf1ab*, *N-sense*, and *S-sense* probes and IHC with nucleocapsid antibody on sections of the lamina propria of the olfactory mucosa of perineurial cases, related to [Figure 5](#)**

Confocal images of sections through OM of COVID #87 (Delta), #89 (Delta), #94 (Delta), and #108 (Omicron BA.1). Names of genes (*italics*) and proteins (roman) are at the bottom left, scale bars at the bottom right. DAPI served as nuclear stain. Blood vessels in (A-D) emit autofluorescence in several channels.

TUBB3-IR signal identifies OSNs (A, B, D, G, and J) and p75-IR signal identifies pONFs (C and E). There are no *N-sense* puncta (A, B, and J) and no *S-sense* puncta (D and G), consistent with the absence of ongoing replication at these sites. Extracellular *orf1ab* puncta (A, B, D-G, and I), extracellular *S* puncta (C, F, H-J), and extracellular *N* puncta (H) together with hazy extracellular nucleocapsid-IR signal (E, F, and I) reflect extracellular virions spreading within the interstitium. Virions stay clear of the pONF enwrapment and do not invade olfactory axon fascicles.
